# Supplementary material
Source: publisher site journal article supplement (https://www.dovepress.com/article/346058)
Supplement: Supplementary file 1 [file get_supplementary_file.php]

Supplementary figure 1

Normalization

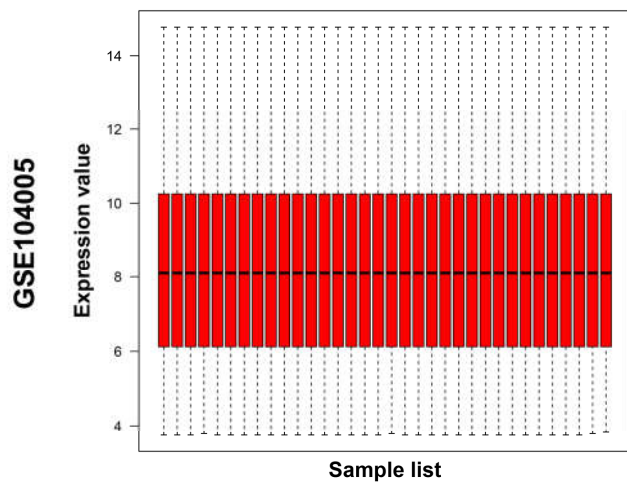

Normalization

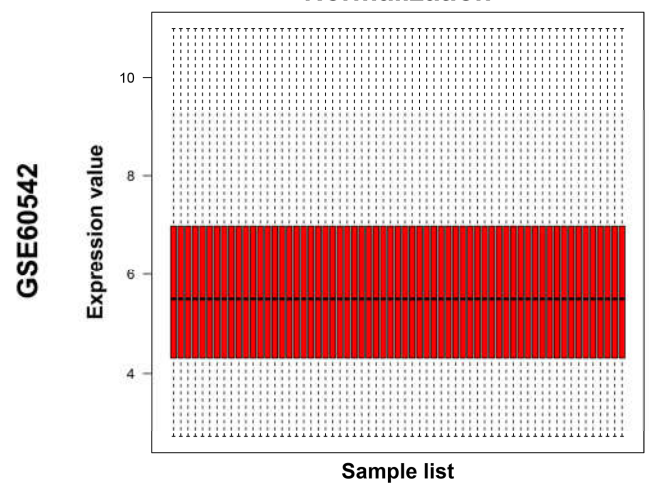

Normalization

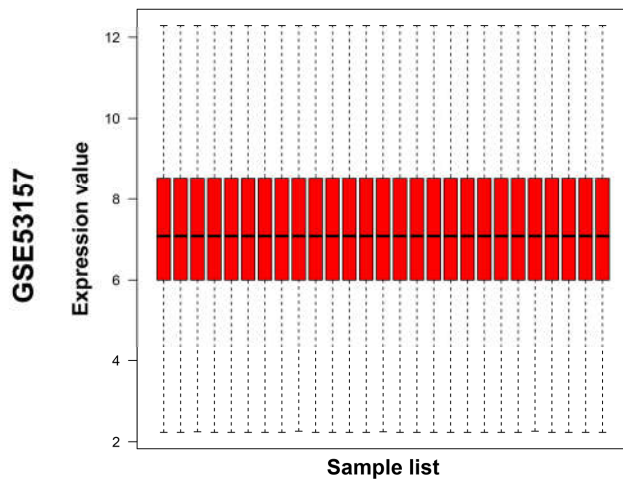

Normalization

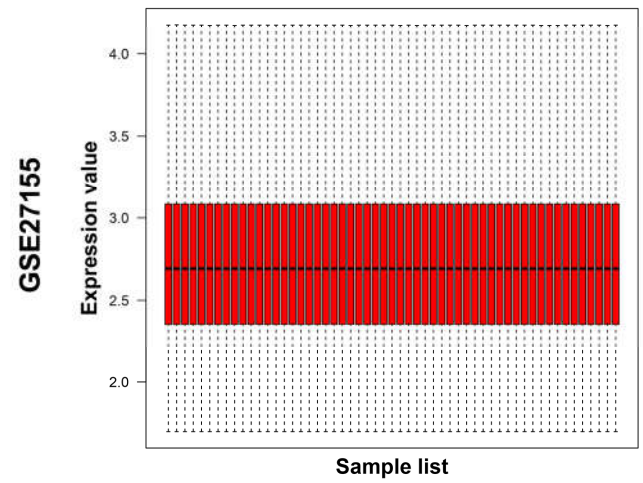

Normalization

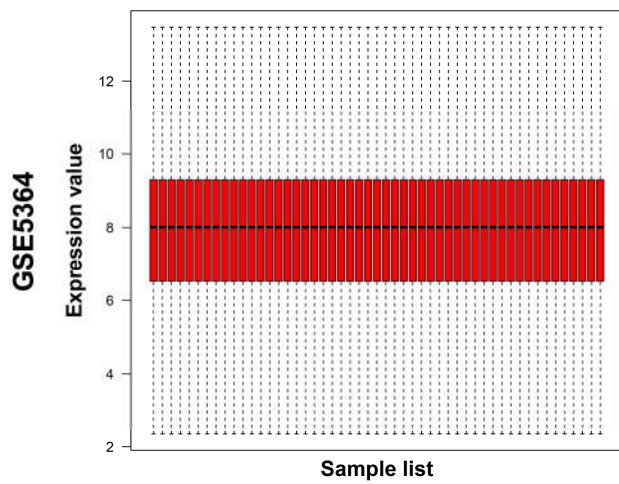

Normalization

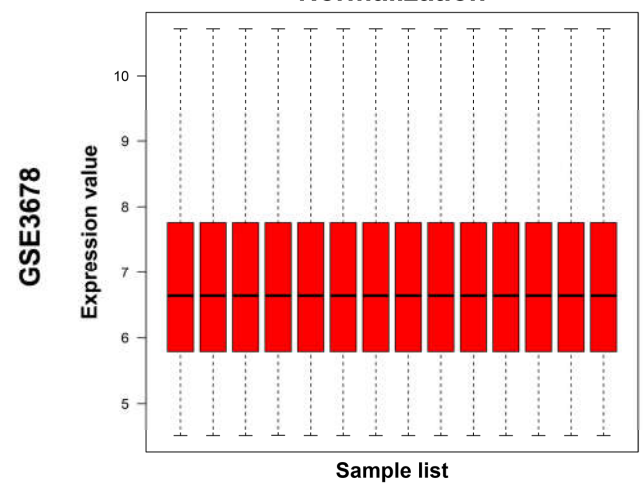

Normalization

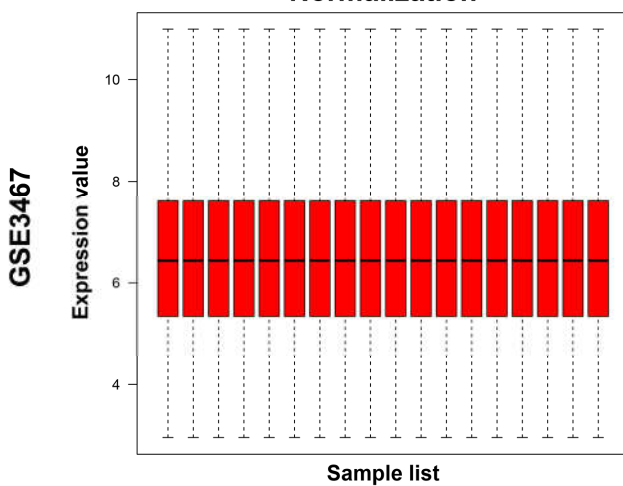

Supplementary figure 2

GSE104005

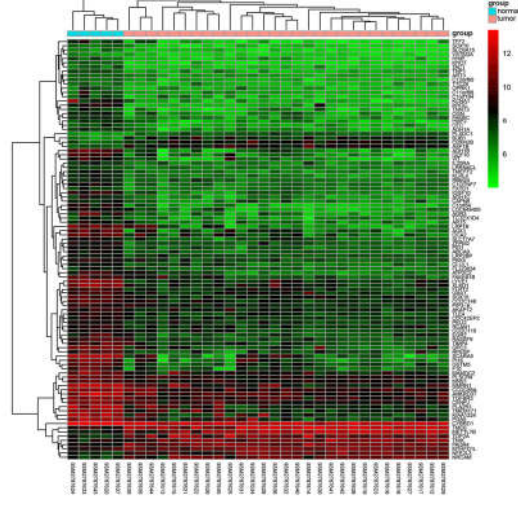

GSE60542

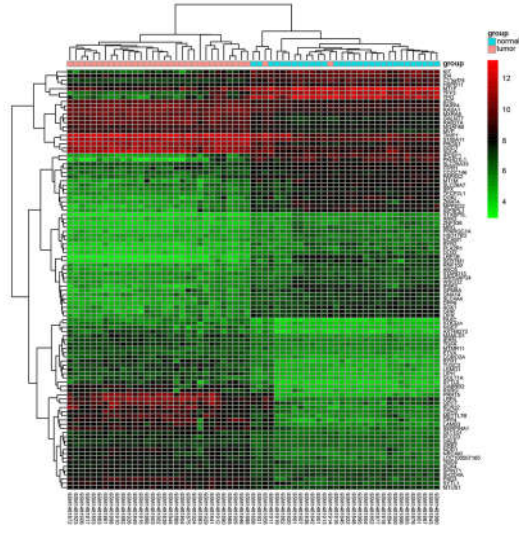

GSE53157

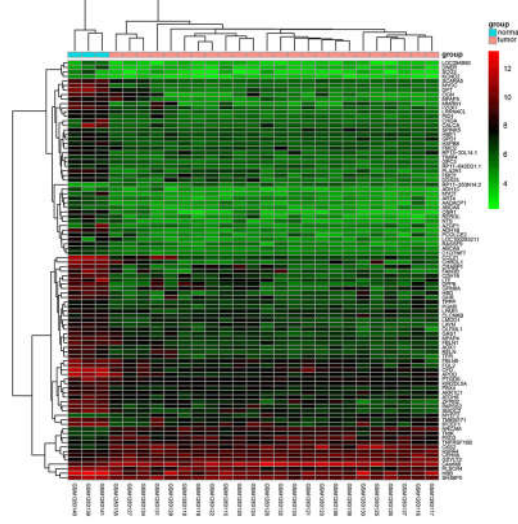

GSE27155

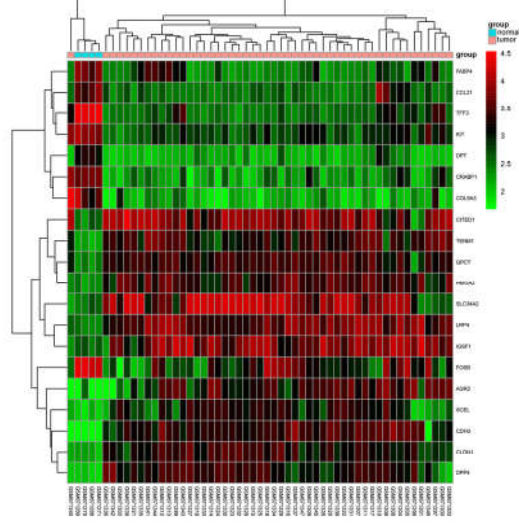

GSE5364

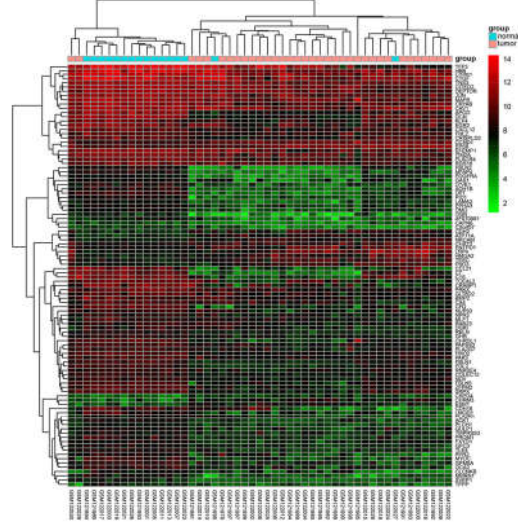

GSE3678

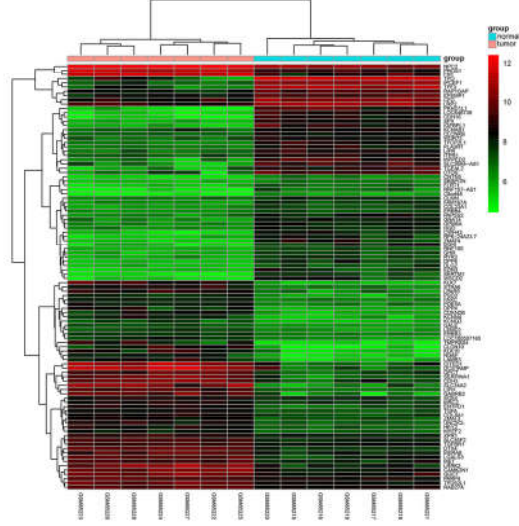

GSE3467

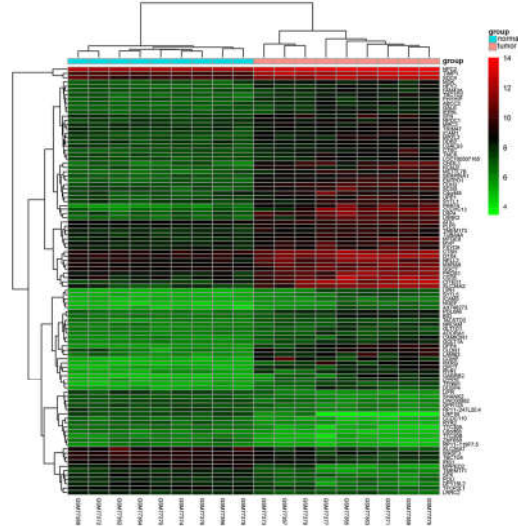



Supplementary figure 3

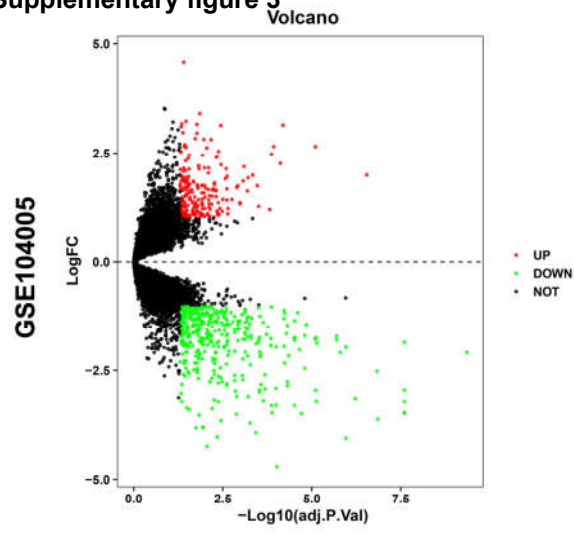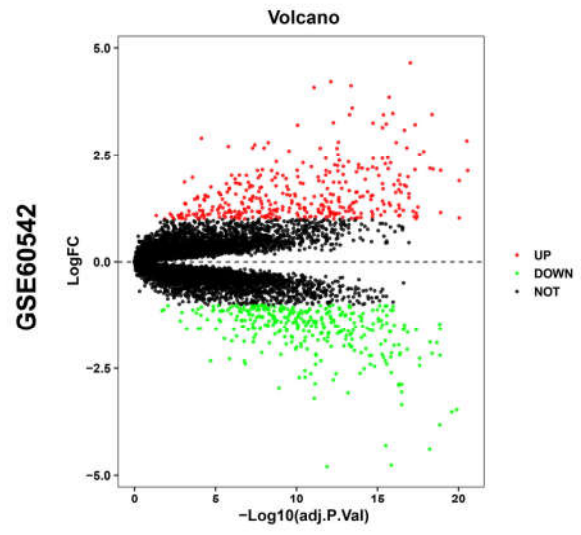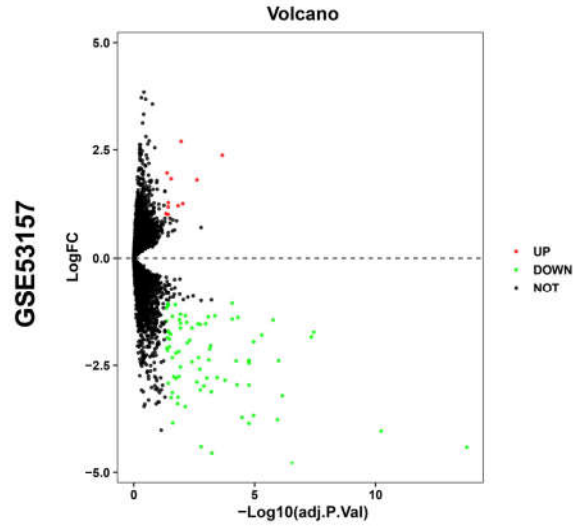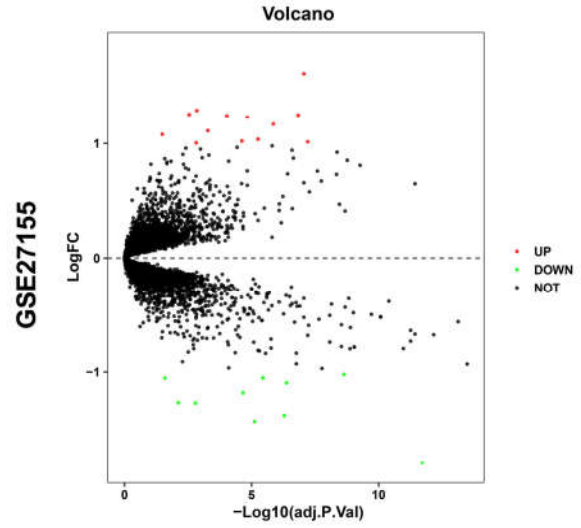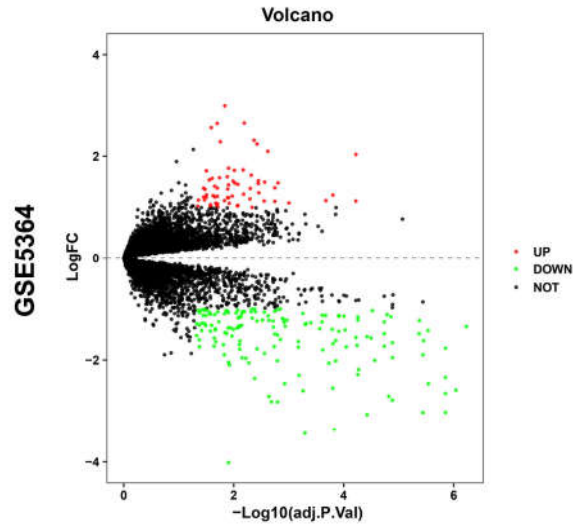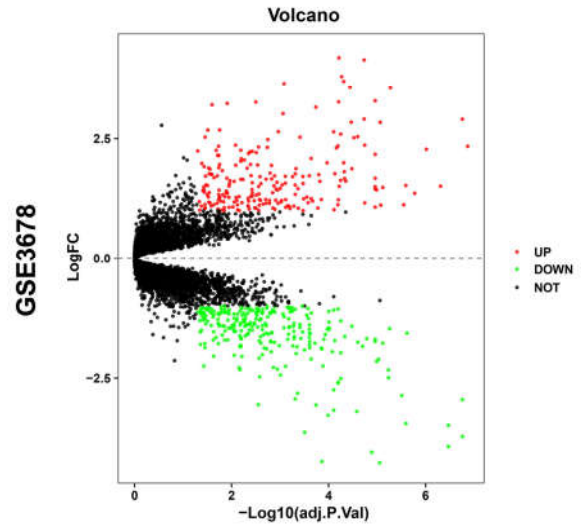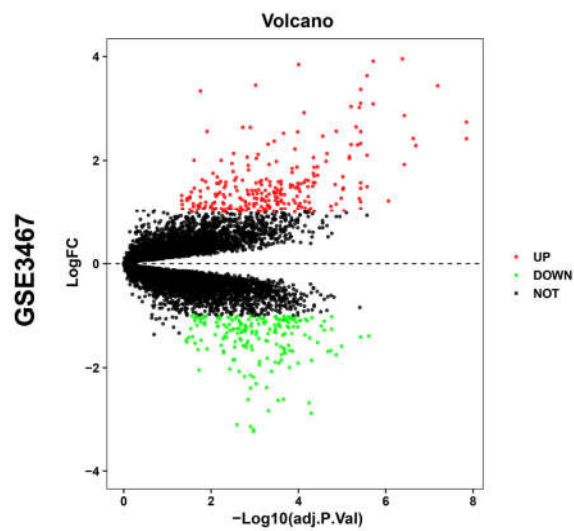

## Figure legends

**Supplementary figure 1** *Normalizations of GSE3467, GSE3678, GSE5364, GSE27155, GSE53157, GSE60542, and GSE104005 datasets.*

**Supplementary figure 2** *Heatmaps of GSE3467, GSE3678, GSE5364, GSE27155, GSE53157, GSE60542, and GSE104005 datasets. (red represents higher expression and green represents lower expression).*

**Supplementary figure 3** *Volcano plots of GSE3467, GSE3678, GSE5364, GSE27155, GSE53157, GSE60542, and GSE104005 datasets (green: downregulated genes; black: not differentially expressed; red: upregulated genes).*
